# Supplementary material for: Supramolecular tuning of thioflavin-T aggregation hosted by polystyrene sulfonate
Source: Royal Society of Chemistry journal article supplement (doi:10.1039/d1cp02030g), 2021-01-01
Supplement: d1cp02030g1.pdf [file d1cp02030g1.pdf]

## Supporting Information

# Supramolecular tuning of Thioflavin-T aggregation hosted by polystyrene sulfonate

*Shrishti P. Pandey,<sup>a,b</sup> Ankur A. Awasthi,<sup>b</sup> and Prabhat K. Singh<sup>b,c,\*</sup>*

<sup>a</sup>Amity Institute of Biotechnology, Amity University, Mumbai-Pune Expressway, Bhatan,  
Panvel, Mumbai, 410206, INDIA

<sup>b</sup>Radiation & Photochemistry Division, Bhabha Atomic Research Centre, Mumbai 400 085,  
INDIA

<sup>c</sup>Homi Bhabha National Institute, Training School Complex, Anushaktinagar, Mumbai 400 094,  
INDIA

\*Authors for correspondence: Email: [prabhatk@barc.gov.in](mailto:prabhatk@barc.gov.in); [prabhatsingh988@gmail.com](mailto:prabhatsingh988@gmail.com)

Tel. 91-22-25590894, Fax: 91-22-5505151

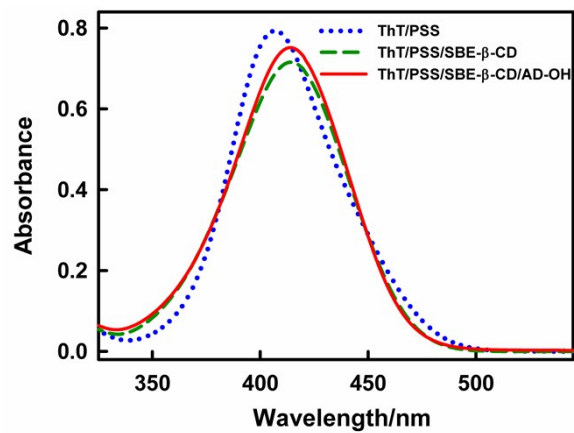

**Figure S1.** Ground-state absorption for ThT in PSS and SBE- $\beta$ -CD at varying concentration of 1-adamantanol. (1) 0 mM (2) 4.2 mM. The dotted blue represents ground-state spectra for ThT in PSS.

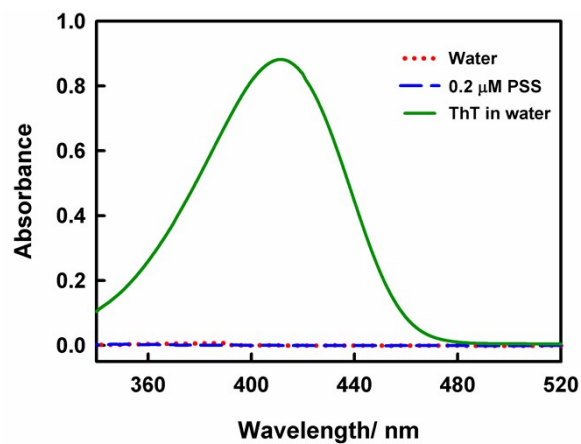

**Figure S2:** Ground-state absorption spectra of (1) water (dotted red line) (2) 0.2 mM PSS (dashed blue line) (3) ThT in water (solid green line).

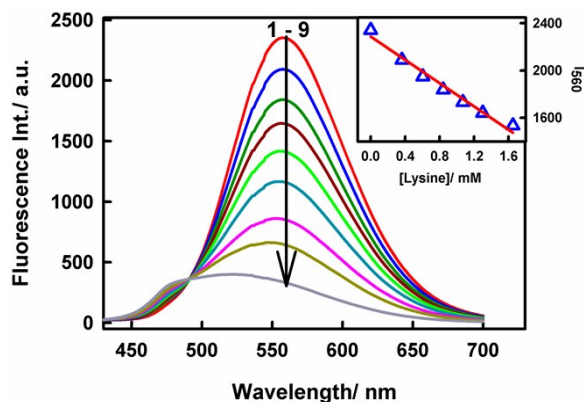

**Figure S3:** Steady-state emission spectra ( $\lambda_{\text{ex}} = 410 \text{ nm}$ ) of ThT in PSS at various concentrations of Lysine (1) 0 mM (2) 0.12 mM (3) 0.84 mM (4) 1.30 mM (5) 2.10 mM (6) 3.42 mM (7) 5.83 mM (8) 9.02 mM (9) 21.99 mM. Inset: Variation in the emission intensity at 560 nm with increasing concentrations of Lysine.  $I_{560} = -492 [\text{Lysine}]/\text{mM} + 2287$ ,  $R^2 = 0.977$ , LOD = 26.4  $\mu\text{M}$ .

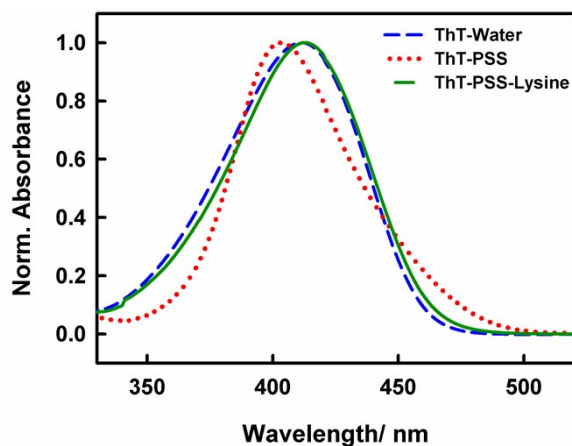

**Figure S4:** Ground-state absorption spectra of ThT in water (dashed blue line), ThT in 0.2  $\mu\text{M}$  PSS (dotted red line) and ThT-PSS complex in presence of 21.99 mM Lysine.

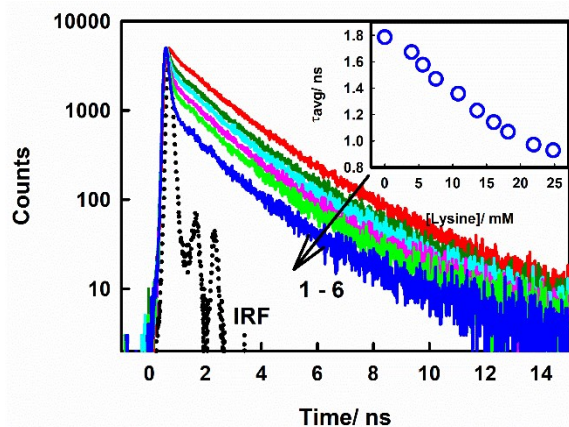

**Figure S5:** Transient emission decay traces of ThT in PSS ( $\lambda_{\text{ex}} = 406 \text{ nm}$ ,  $\lambda_{\text{em}} = 560 \text{ nm}$ ) at varying concentration of Lysine (1) 0 mM (2) 5.6 mM (3) 7.5 mM (4) 10.8 mM (5) 12.8 mM (6) 24.8 mM. The black dotted line represents the Instrument response function. Inset: Variation in excited-state lifetime ( $\tau_{\text{avg}}$ ) for ThT-PSS complex at varying concentration of Lysine.
